# Supplementary material
Source: PubMed Central journal article supplement (PMC7914212)
Supplement: NIHMS1668423-supplement-7.pdf [file NIHMS1668423-supplement-7.pdf]

# The Role of Potassium and Host Calcium Signaling in *Toxoplasma gondii* egress

Stephen A. Vella et al

## Supporting Information Supplemental Figures:

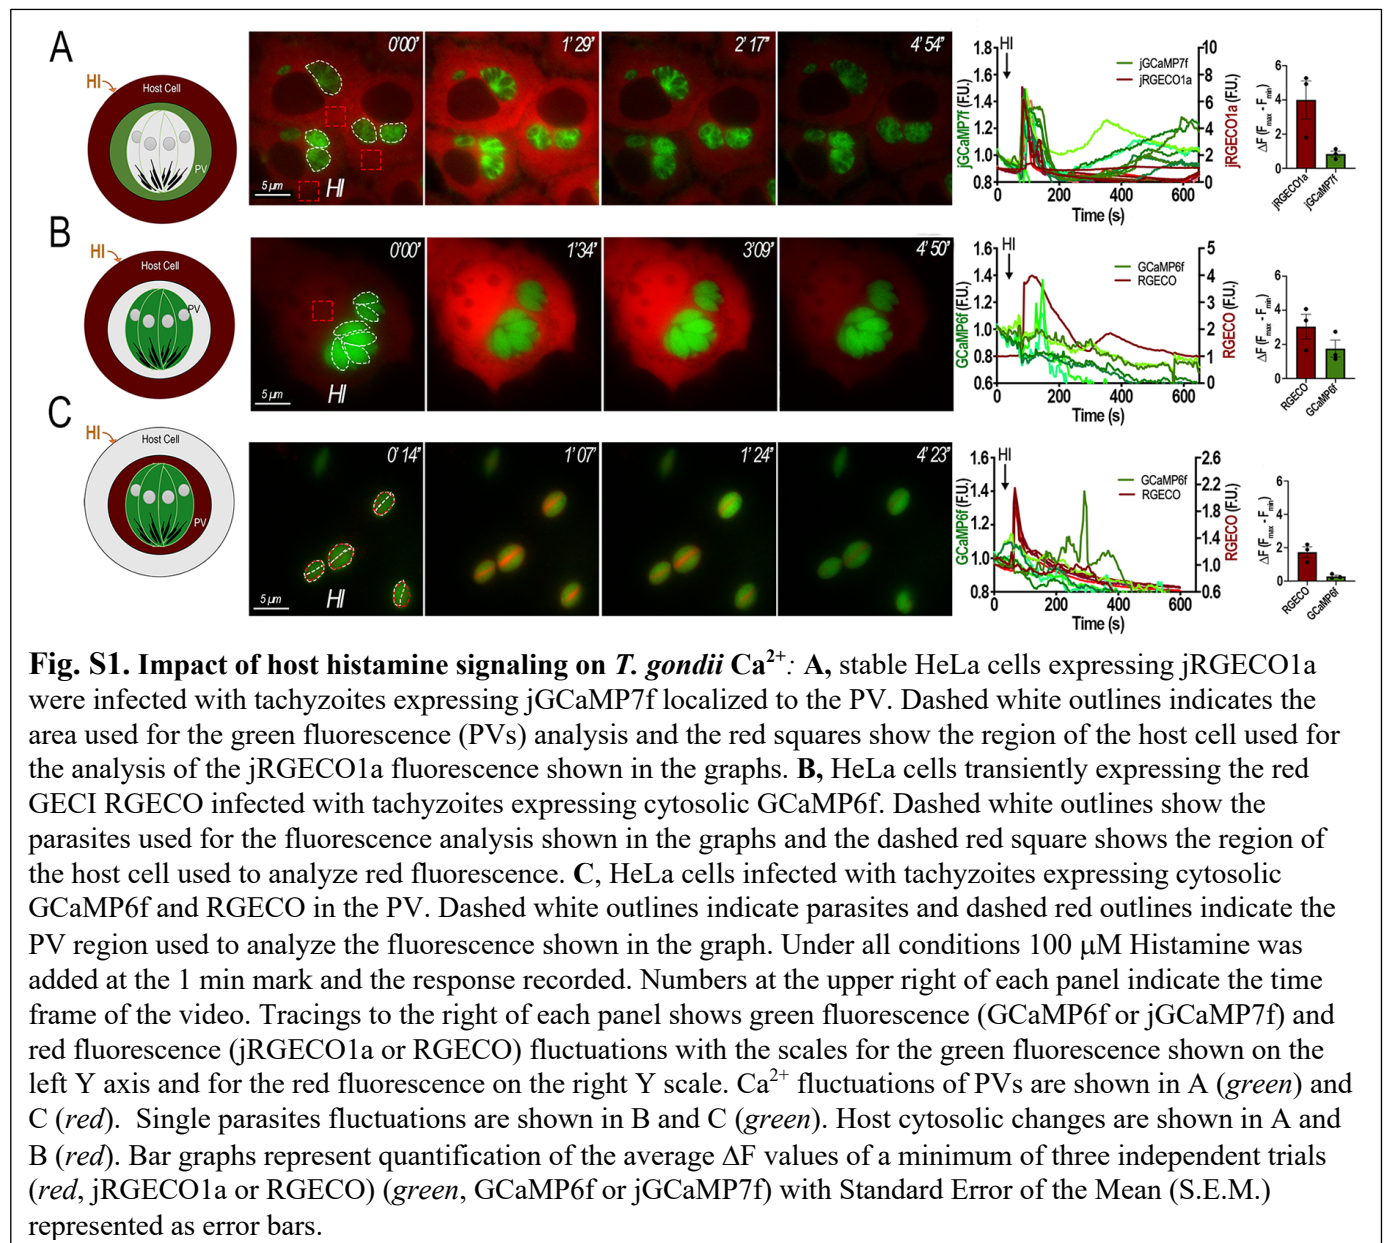

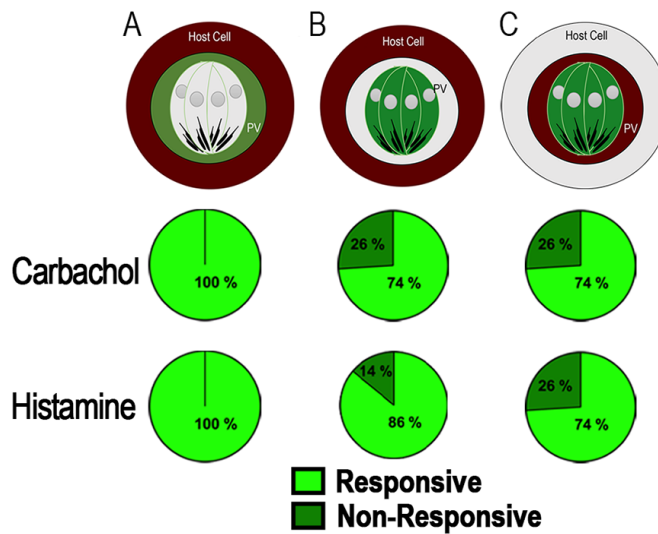

**Figure S2. Quantification of parasite responsiveness after addition of carbachol or histamine:** **A**, Quantification of responsive vs. non-responsive PVs from Figs 1A (carbachol) and S1A (histamine). 100% of PVs respond to the addition of either agonist. **B**, Quantification of the % of responsive tachyzoites expressing cytosolic GCaMP6f to carbachol or histamine. The experiment are the ones presented in Fig. 1B and S1B. **C**, % of tachyzoites responding to Carbachol or Histamine addition. The experimental conditions are the ones from Figs 1C and S1C. Light green portions are used to represent the percentage of responsive cells and dark green portions are used to represent the percentage of non-responsive cells.

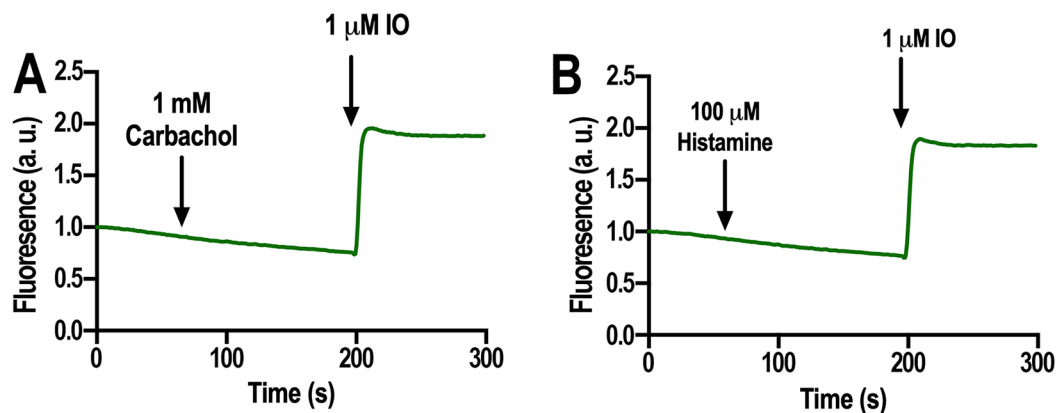

**Figure S3. Extracellular tachyzoites expressing cytosolic GCaMP6f do not respond to carbachol or histamine:** The fluorescence changes of  $2 \times 10^7$  cells/mL of GCaMP6f tachyzoites resuspended in Ringer Buffer supplemented with 2 mM  $\text{Ca}^{2+}$  were analyzed in a fluorescence spectrophotometer, Hitachi 7000. Excitation was set at 485 nm and emission at 520 nm. Traces shown are an average of three independent experiments conducted on separate cell preparations. (A) Addition of 1 mM Carbachol (A) or 100  $\mu\text{M}$  Histamine (B) at 60 seconds lead to no increase in the GCaMP6f signal and at 200 second 1  $\mu\text{M}$  of Ionomycin was added as control for responsiveness.

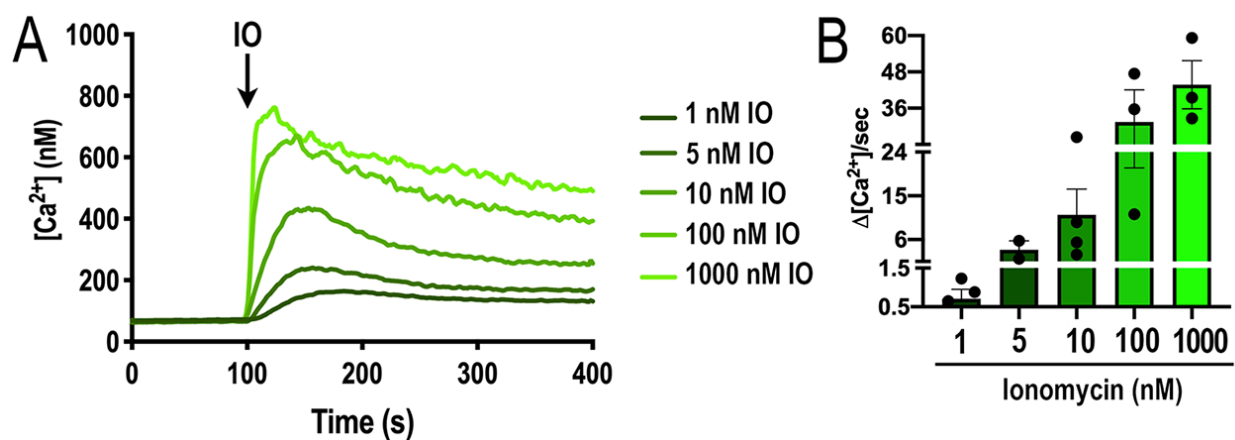

**Fig S4. Calibration of  $Ca^{2+}$  threshold:** (A) RH tachyzoites ( $5 \times 10^7$ ) were loaded with FURA2-AM and resuspended in 2.5 mL of Ringer's Buffer supplemented with 100  $\mu$ M EGTA. The cytosolic  $Ca^{2+}$  response to the addition of various concentrations of ionomycin is shown. The figure shows the average of at least 2 trials of each condition; (B) Quantification of ionomycin titration curve. The first 15 seconds of the slope after addition of ionomycin was determined and averaged from at least two independent trials

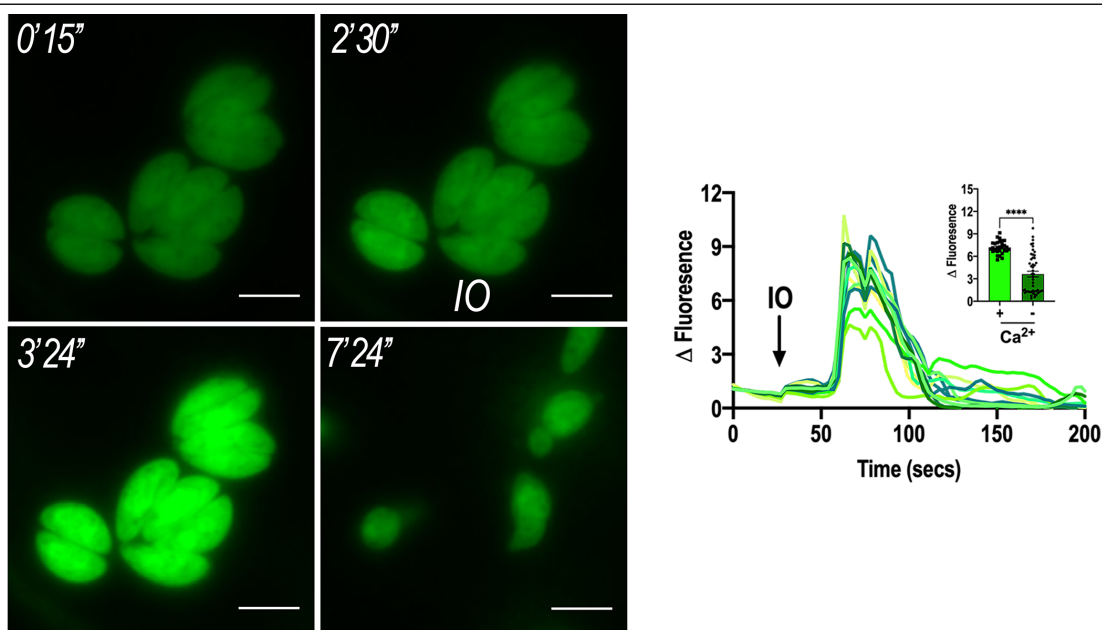

**Fig. S5. Ionomycin Induced Egress in  $Ca^{2+}$  Free Buffer:** A) HeLa cells were infected with GCaMP6f-expressing tachyzoites in buffer supplemented with 100  $\mu$ M EGTA to create a  $Ca^{2+}$ -free extracellular buffer. 1  $\mu$ M Ionomycin was added to trigger egress. B) Representative fluorescence tracings of ionomycin addition in  $Ca^{2+}$  free buffer. Inset: quantification of ionomycin induced egress between  $Ca^{2+}$ -rich and  $Ca^{2+}$ -free media. Error bars represent the Standard Error of the Mean (S.E.M.)

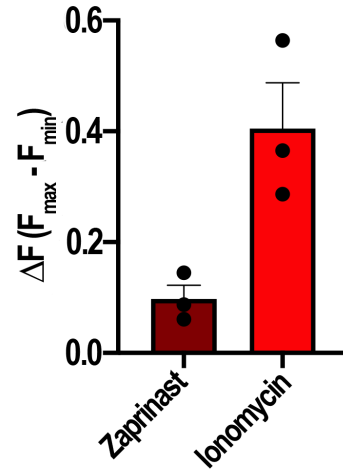

**Fig S6. Off targeting effect of zaprinast on host cells:** HeLa cells stably expressing jRGECO1a were used for video microscopy analysis. 100  $\mu$ M Zaprinast was added at approximately 60 seconds and 1  $\mu$ M ionomycin was added at 300 seconds.  $\Delta F$  represents the difference between the maximum fluorescence and minimum fluorescence 10 seconds before and 10 seconds after addition of either zaprinast or ionomycin

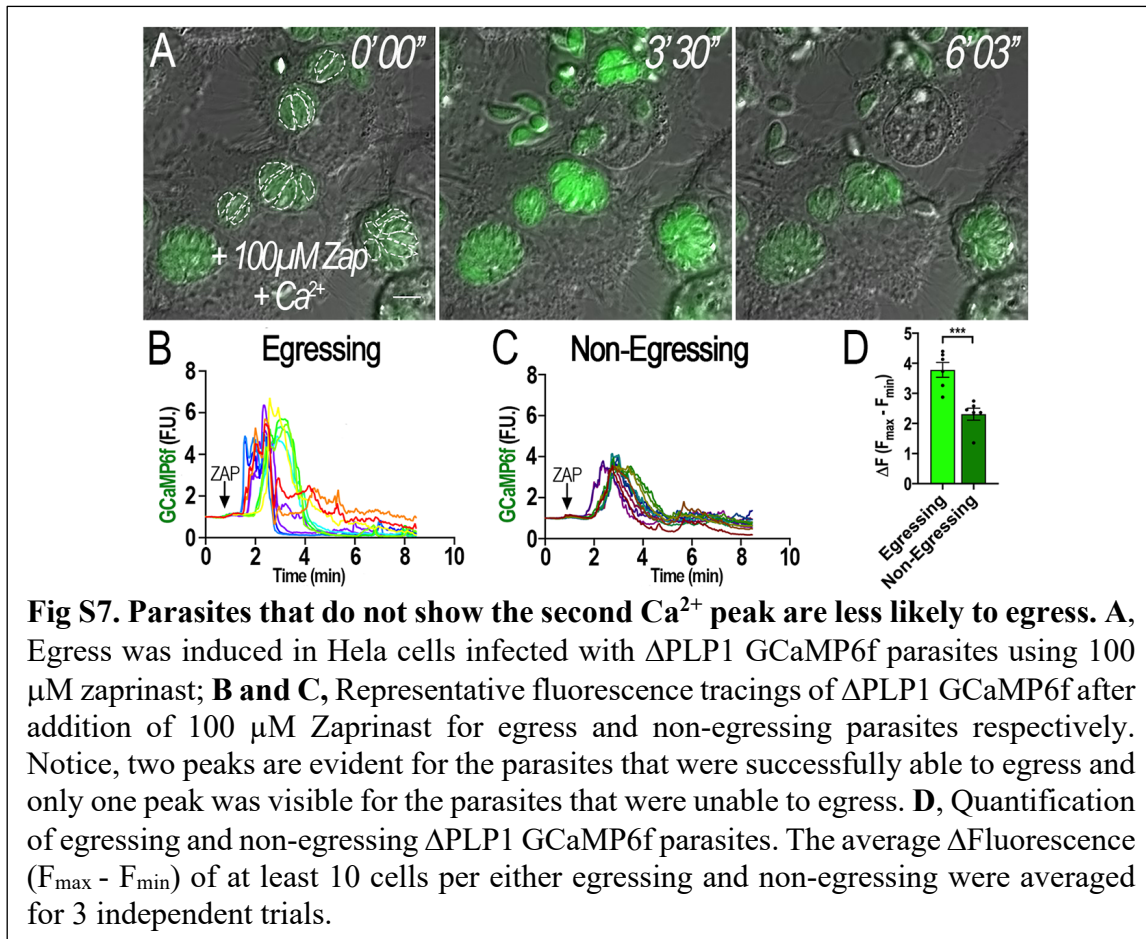

**Fig S7. Parasites that do not show the second  $\text{Ca}^{2+}$  peak are less likely to egress.** A, Egress was induced in HeLa cells infected with  $\Delta$ PLP1 GCaMP6f parasites using 100  $\mu$ M zaprinast; **B and C**, Representative fluorescence tracings of  $\Delta$ PLP1 GCaMP6f after addition of 100  $\mu$ M Zaprinast for egress and non-egressing parasites respectively. Notice, two peaks are evident for the parasites that were successfully able to egress and only one peak was visible for the parasites that were unable to egress. **D**, Quantification of egressing and non-egressing  $\Delta$ PLP1 GCaMP6f parasites. The average  $\Delta$ Fluorescence ( $F_{\text{max}} - F_{\text{min}}$ ) of at least 10 cells per either egressing and non-egressing were averaged for 3 independent trials.

## Legends for Supplemental Videos

**Video S1. Carbachol addition in GCaMP6f Infected Host Cells:** HeLa cells transiently expressing cytosolic localized RGECO were infected with cytosolic GCaMP6f expressing parasites. 1 mM Carbachol was added at approximately the 1 min mark. (Fig. 1B shows still images from this video).

**Video S2. Thapsigargin stimulation in LAR-GECO expressing host cells:** HeLa cells transiently expressing the low affinity mitochondrial  $\text{Ca}^{2+}$  indicator LAR-GECO1.2 were infected with cytosolic GCaMP6f expressing parasite. 2  $\mu\text{M}$  Thapsigargin was added at approximately the 1 min mark. (Fig. 2B shows still images from this video).

**Video S3. Two-peaks of  $\text{Ca}^{2+}$  contribute to parasite egress:** HeLa cells infected with cytosolic GCaMP6f parasites were treated with 100  $\mu\text{M}$  of Zaprinast in media supplemented with 2 mM  $\text{Ca}^{2+}$ . (Fig. 3E shows still images from this video).

**Video S4. Natural egress in cpd 1 synchronized parasites:** HeLa cells stably expressing cytosolic jRGECO1a infected with cytosolic GCaMP6f expressing parasites. After 24 h post infection 1  $\mu\text{M}$  cpd1 was added. 24 hr post cpd1 addition parasite egress was imaged after cpd1 wash off. (Fig. 4A shows still images from this video).

**Video S5. Whole-cell patch under high  $\text{K}^+$  and high  $\text{Ca}^{2+}$  conditions:** HeLa cells infected with GCaMP6f parasites were whole-cell patched with a patch pipette solution containing 140 mM  $\text{K}^+$  and 10  $\mu\text{M}$   $\text{Ca}^{2+}$ . Note parasite egress is slow, methodical, and occurring one-by-one in comparison to detergents and ionophores. Video presented in real time. (Fig. 6B shows still images from this video).

**Video S6. Whole-cell patch under low  $\text{K}^+$  and high  $\text{Ca}^{2+}$  conditions:** HeLa cells infected with GCaMP6f parasites were whole-cell patched with a patch pipette solution comprising 10 mM  $\text{K}^+$ , 130 mM choline chloride, and 10  $\mu\text{M}$   $\text{Ca}^{2+}$ . Parasite egress was slower in comparison to detergents and ionophores, but more rapidly in comparison to high  $\text{K}^+$  conditions. Parasite egress occurred almost explosively (all parasites egressed at once) under these conditions. Video presented in real time. (Fig. 6C shows still images from this video).

## Supplemental Tables

**Table S1: Genetically Encoded Calcium Indicators (GECI) used in this study**

| GECI        | Kd (nM) | Dynamic Range | Use                                                                                                                                                                                                                           | Source or Reference |
|-------------|---------|---------------|-------------------------------------------------------------------------------------------------------------------------------------------------------------------------------------------------------------------------------|---------------------|
| GCaMP6f     | 375     | 51.8          | Standard, well established GECI, with fast on-off kinetics. We previously used this GECI to study <i>T. gondii</i> Ca <sup>2+</sup> dynamics                                                                                  | [1]                 |
| R-GECO      | 482     | 16            | First generation red GECI, enables multi-color imaging when co-expressed with GCaMP6f or jGCaMP7f                                                                                                                             | [2]                 |
| jRGECO1a    | 148     | 12            | Second generation red GECI with improved kinetics and enhanced sensitivity                                                                                                                                                    | [3]                 |
| jGCaMP7f    | 174     | 30.2          | Successor to GCaMP6f with improved sensitivity and faster on/off kinetics                                                                                                                                                     | [4]                 |
| LAR-GECO1.2 | 12,000  | 8.7           | Low affinity red GECI with optimized kinetics/sensitivity for the mitochondria of mammalian cells. Host mitochondria surrounds the PV and this indicator permits to see Ca <sup>2+</sup> fluxes through the host mitochondria | [5]                 |

**Table S2: Parasite strains generated and used in this work**

| Strains                          | Characteristics                                                                   | Source/Ref |
|----------------------------------|-----------------------------------------------------------------------------------|------------|
| RH with cytosolic GCaMP6f        | Non-selectable drug RH strain expressing GCaMP6f in the cytosol                   | [6]        |
| RH PV-jGCaMP7f                   | Expression of jGCaMP7f in the lumen of the PV                                     | This study |
| RH PV-RGECO <i>Cyto</i> -GCaMP6f | Expression of PV-RGECO in the lumen of the PV and cytosolic expression of GCaMP6f | [6]        |

**Table S3: Plasmids used for this work**

| <b>Plasmid</b>                            | <b>Characteristics</b>                                                              | <b>Source or Reference</b> |
|-------------------------------------------|-------------------------------------------------------------------------------------|----------------------------|
| pGP-CMV-GCaMP6f                           | Transient expression of the GEC1 GCaMP6f in mammalian cells                         | [1]                        |
| pCMV-NLS-R-GECO                           | Transient expression of the GEC1 R-GECO in mammalian cells                          | [2]                        |
| pGP-CMV-NES-jRGECO1a                      | Transient expression of the GEC1 jRGECO1a in mammalian cells                        | [3]                        |
| pGP-CMV-jGCaMP7f                          | Transient expression of the GEC1 jGCaMP7f in mammalian cells                        | [4]                        |
| pCMV-mito-LAR-GECO1.2                     | Transient expression of the GEC1 LAR-GECO1.2 in the mitochondria of mammalian cells | [5]                        |
| ptub_IE $\alpha$ -DsRed_DHFR_sag1CATsag1  | Plasmid vector for expressing proteins in the lumen of the PV                       | [7]                        |
| pCTH3                                     | Random Integration of a chloramphenicol selection plasmid expressing 3xHA epitopes  | [8]                        |
| ptub_IE $\alpha$ -R-GECO_DHFR_sag1CATsag1 | Expressing the GEC1 R-GECO in the lumen of the PV                                   | [6]                        |
| pUltra                                    | Lentivirus expression of a gene of interest                                         | [9]                        |
| jRGECO1a-pUltra                           | Lentivirus expression of the Red GEC1 jRGECO1a                                      | This study                 |

**Table S4: Oligonucleotide primers used in this work**

| <b>To construct PV-jGCaMP7f</b>     |                                                     |            |
|-------------------------------------|-----------------------------------------------------|------------|
| SV229-jGCaMP7f-GIB-FWD              | GGGCTGCAatgggttctcatcatc                            | This study |
| SV72-jRCaMP1b-Gib-R                 | ccgggacgtcgtacgggtacctaggCTTCGCTGTCA<br>TCATTTGTAC  | This study |
| SV77-P30-Gib-Fwd                    | TTTCTTGAATTCCCTTTTAGATCTATGTTT<br>CCGAAGGCAGTGAGACG | This study |
| SV-228-P30-Gib-Rev                  | gaacccatTGCAGCCCCGGCAAACCTC                         | This study |
| SV225-pCTH3-Gib-FWD                 | cagcgaagCctaggtaccgtagc                             | This study |
| SV226-Tub-Gib-Rev                   | CGGAAACATAGATCtaaaaggaattcaagaaaa<br>aatg           | This study |
| <b>To construct jRGECO1a-pUltra</b> |                                                     |            |
| SV155V2-jRGECO1a-AgeI-Fwd           | aCCGGTATGCTGCAGAACGAGCTTGCTC<br>TTA                 | This study |
| SV156-jRGECO1a-ECORI-Rev            | GAATTCGCCTACTTCGCTGTCATCATTTG<br>TACA               | This study |

**References for supplemental Tables:**

1. Akerboom J, Carreras Calderon N, Tian L, Wabnig S, Prigge M, Tolo J, et al. Genetically encoded calcium indicators for multi-color neural activity imaging and combination with optogenetics. *Front Mol Neurosci.* 2013;6:2. Epub 2013/03/06. doi: 10.3389/fnmol.2013.00002. PubMed PMID: 23459413; PubMed Central PMCID: PMC3586699.
2. Zhao Y, Araki S, Wu J, Teramoto T, Chang YF, Nakano M, et al. An expanded palette of genetically encoded Ca(2)(+) indicators. *Science.* 2011;333(6051):1888-91. Epub 2011/09/10. doi: 10.1126/science.1208592. PubMed PMID: 21903779.
3. Dana H, Mohar B, Sun Y, Narayan S, Gordus A, Hasseman JP, et al. Sensitive red protein calcium indicators for imaging neural activity. *Elife.* 2016;5. Epub 2016/03/25. doi: 10.7554/eLife.12727. PubMed PMID: 27011354; PubMed Central PMCID: PMC3586699.
4. Dana H, Sun Y, Mohar B, Hulse BK, Kerlin AM, Hasseman JP, et al. High-performance calcium sensors for imaging activity in neuronal populations and microcompartments. *Nat Methods.* 2019;16(7):649-57. Epub 2019/06/19. doi: 10.1038/s41592-019-0435-6. PubMed PMID: 31209382.
5. Wu J, Prole DL, Shen Y, Lin Z, Gnanasekaran A, Liu Y, et al. Red fluorescent genetically encoded Ca<sup>2+</sup> indicators for use in mitochondria and endoplasmic reticulum. *Biochem J.* 2014;464(1):13-22. Epub 2014/08/29. doi: 10.1042/BJ20140931. PubMed PMID: 25164254; PubMed Central PMCID: PMC3586699.
6. Borges-Pereira L, Budu A, McKnight CA, Moore CA, Vella SA, Hortua Triana MA, et al. Calcium Signaling throughout the *Toxoplasma gondii* Lytic Cycle: A STUDY USING



GENETICALLY ENCODED CALCIUM INDICATORS. *J Biol Chem.* 2015;290(45):26914-26. Epub 2015/09/17. doi: 10.1074/jbc.M115.652511. PubMed PMID: 26374900; PubMed Central PMCID: PMC4646405.

7. Kafsack BF, Pena JD, Coppens I, Ravindran S, Boothroyd JC, Carruthers VB. Rapid membrane disruption by a perforin-like protein facilitates parasite exit from host cells. *Science.* 2009;323(5913):530-3. Epub 2008/12/20. doi: 10.1126/science.1165740. PubMed PMID: 19095897; PubMed Central PMCID: PMC2662845.
8. Chasen NM, Stasic AJ, Asady B, Coppens I, Moreno SNJ. The Vacuolar Zinc Transporter TgZnT Protects *Toxoplasma gondii* from Zinc Toxicity. *mSphere.* 2019;4(3). Epub 2019/05/24. doi: 10.1128/mSphere.00086-19. PubMed PMID: 31118298; PubMed Central PMCID: PMC6531880.
9. Lou YL, Guo F, Liu F, Gao FL, Zhang PQ, Niu X, et al. miR-210 activates notch signaling pathway in angiogenesis induced by cerebral ischemia. *Mol Cell Biochem.* 2012;370(1-2):45-51. Epub 2012/07/27. doi: 10.1007/s11010-012-1396-6. PubMed PMID: 22833359.
